# Supplementary material for: Synergistic effect of the bifunctional polydopamine–Mn3O4composite electrocatalyst for vanadium redox flow batteries
Source: Royal Society of Chemistry journal article supplement (doi:10.1039/c7ta03922k), 2017-01-01
Supplement: c7ta03922k1.pdf [file c7ta03922k1.pdf]

**Supplementary Information**

**Synergistic Effect of Bifunctional Polydopamine-Mn<sub>3</sub>O<sub>4</sub> Composite  
Electrocatalyst for Vanadium Redox Flow Batteries**

Ya Ji <sup>a</sup>, Jacelyn Liangshi Li<sup>a</sup>, Sam Fong Yau Li <sup>a,b\*</sup>

<sup>a</sup> Department of Chemistry, Faculty of Science, National University of  
Singapore, Singapore 117543, Singapore

<sup>b</sup> NUS Environmental Research Institute, National University of  
Singapore, Singapore 117411, Singapore

\* Corresponding author.

Tel.: +65 65162681; fax: +65 67791691. 18

E-mail address: chmlifys@nus.edu.sg (S.F.Y. Li).

**Contents**

I. Calculation of diffusion coefficient (D) from Randles-Sevcik equation

II. Calculation of average size of Mn<sub>3</sub>O<sub>4</sub> crystal from XRD

III. Figures (Figure S1; Figure S2; Figure S3; Figure S4)

IV. Tables (Table S1)

23 I. Calculation of diffusion coefficient (D) from Randles-Sevcik equation

24 According to Randles-Sevcik equation, for a redox reaction, the peak

25 current  $i_p$  is calculated in Eq. (S1) and Eq. (S2) <sup>1</sup>:

26

27  $i_p = 2.69 \times 10^5 n^{3/2} A D^{1/2} C v^{1/2}$  (reversible system) Eq. S1

28  $i_p = 2.99 \times 10^5 n^{3/2} \alpha^{1/2} A D^{1/2} C v^{1/2}$  (irreversible system) Eq. S2

29

30 where n is the number of electron transfer in redox reaction, A is the area

31 of the working electrode, C is the primary concentration of reactant, D is

32 the diffusion coefficient, V is the scan rate and  $\alpha$  is the transfer coefficient

33 (0.5). Since the reaction is quasi-reversible process, the real value of D

34 should be in the range between the calculated values obtained from Eq. S1

35 and S2.

36 II. Calculation of average size of  $\text{Mn}_3\text{O}_4$  crystal from XRD

37 The average size of the  $\text{Mn}_3\text{O}_4$  crystallites can be calculated by using the  
38 Scherrer equation shown below <sup>2</sup>:

$$39 \quad D = \frac{k\lambda}{\beta \cos \theta} \quad \text{Eq. S3}$$

40 where D is the mean crystalline size,  $\lambda$  the X-ray wavelength,  $\beta$  is the full  
41 width at half-maximum of the peak (in radians),  $\theta$  the Bragg angle at which  
42 the peak is observed, and K the shape factor, which is dependent on the  
43 shape of the particle (0.9 is usually used for particles of unknown  
44 geometry).

45

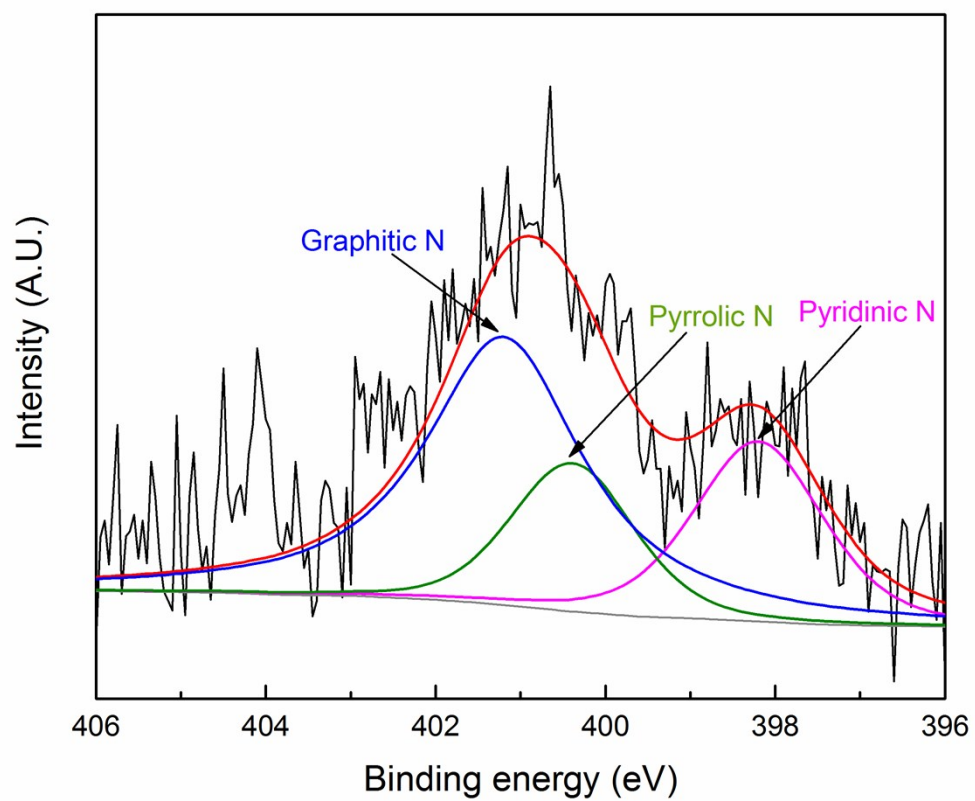

46

47 Figure S1. N 1s XPS spectrum of PDA modified GF.

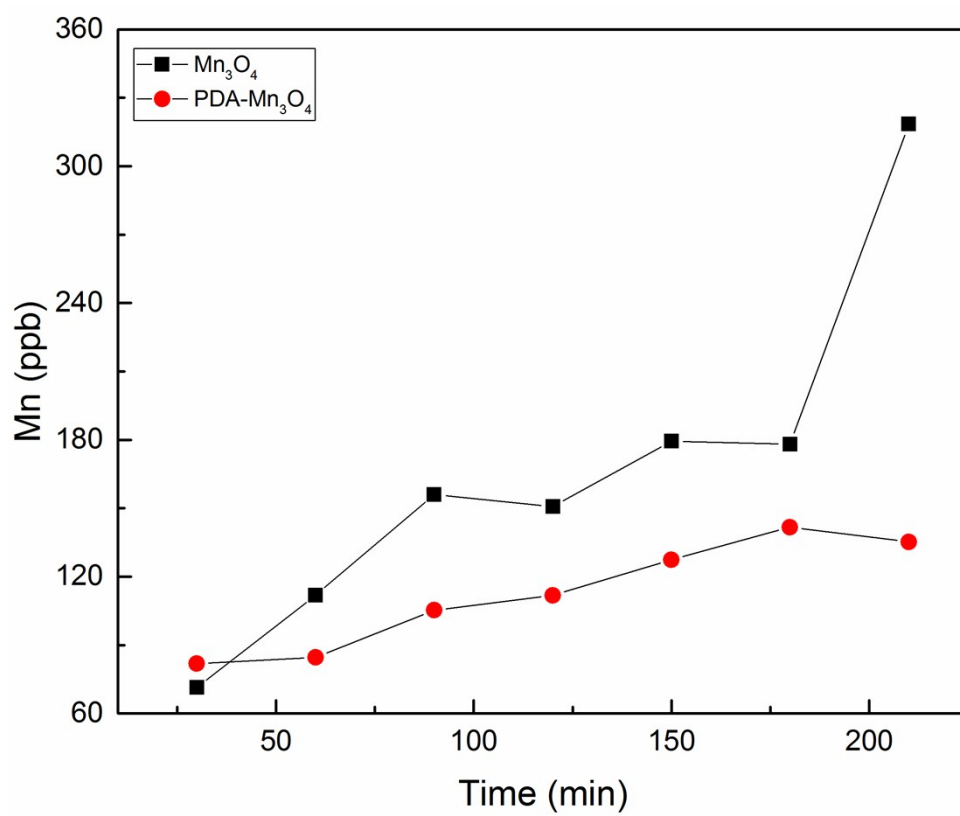

49

50 Figure S2. Loss of Mn from PDA- $\text{Mn}_3\text{O}_4$  composite GF.

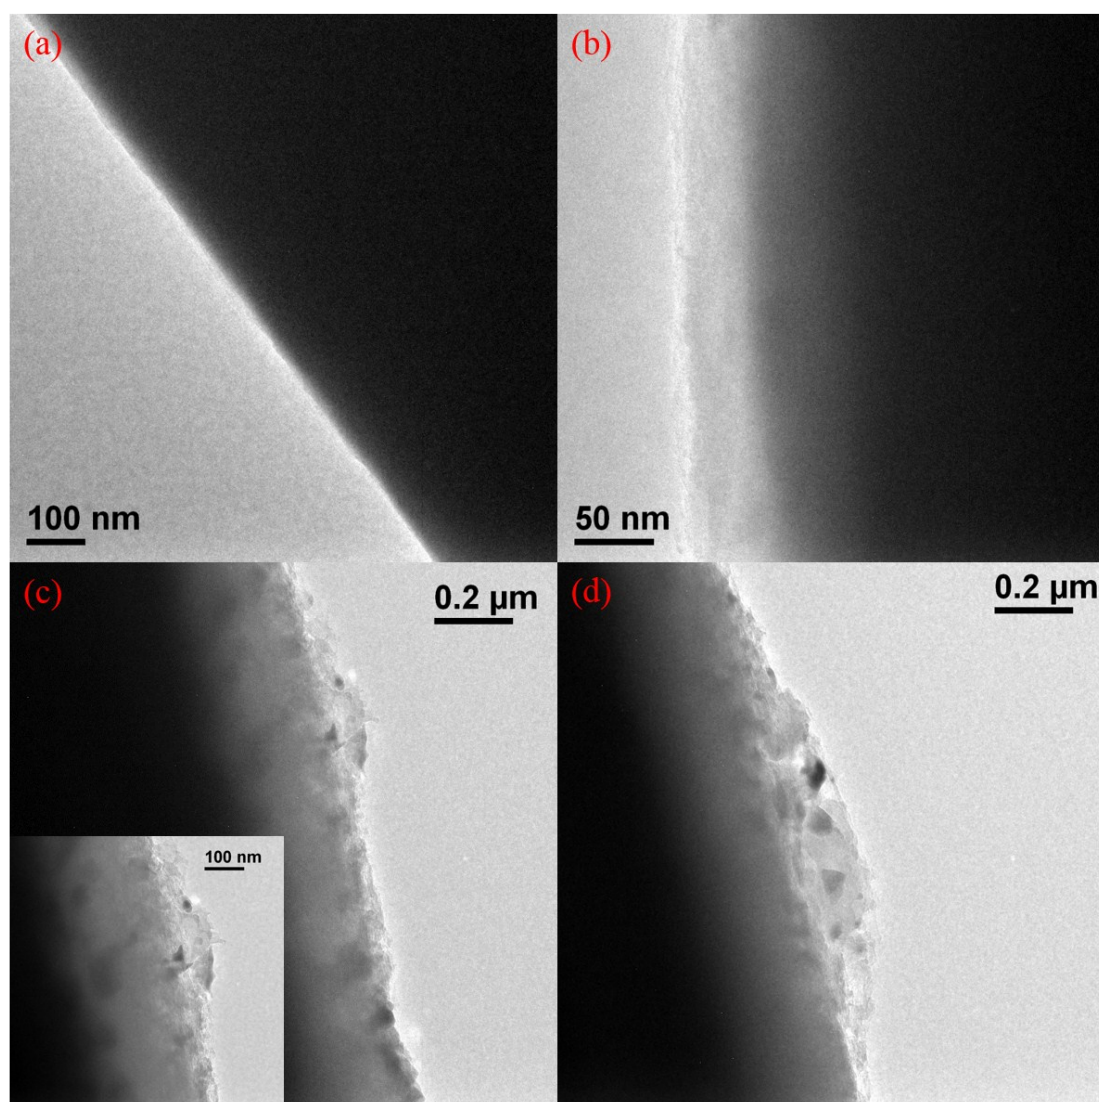

51  
52 Figure S3. TEM of (a) blank GF, (b) PDA GF, (c) and (d) PDA-Mn<sub>3</sub>O<sub>4</sub>  
53 composite GF at different spots.

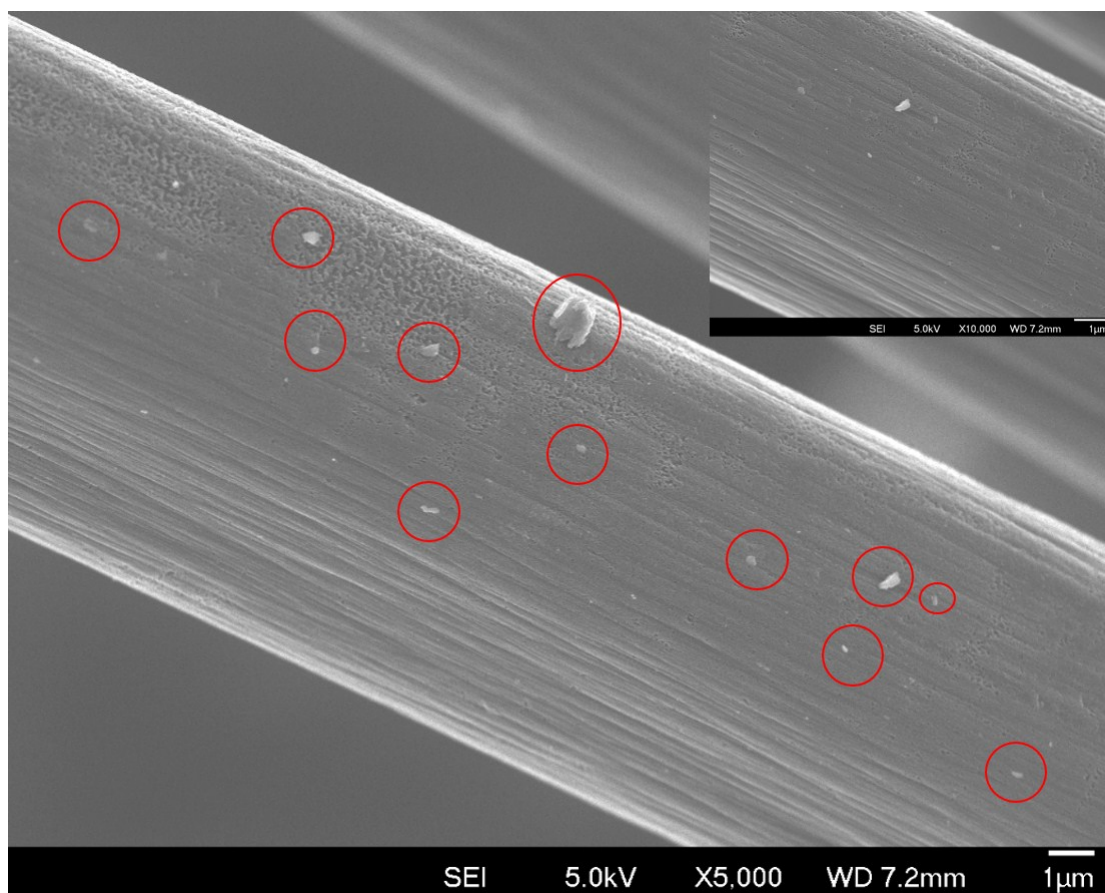

54

55 Figure S4. SEM of PDA-Mn<sub>3</sub>O<sub>4</sub> composite GF after VRFB single cell test  
56 for 50 cycles.

57

58 Table S1. Efficiency comparison between this work and literatures <sup>3-7</sup>

| <b>Positive Electrode type</b>           | <b>Current density/<br/>mA cm<sup>-2</sup></b> | <b>EE/%</b> | <b>Ref</b> |
|------------------------------------------|------------------------------------------------|-------------|------------|
| PDA-Mn <sub>3</sub> O <sub>4</sub> GF    | 50                                             | 84.6        | this work  |
| PDA-Mn <sub>3</sub> O <sub>4</sub> GF    | 100                                            | 73.7        | this work  |
| CNF-CNT GF                               | 100                                            | 65.6        | ref 3      |
| Mn <sub>3</sub> O <sub>4</sub> -MWCNT GF | 20                                             | 84.6        | ref 4      |
| MWCNT GF                                 | 50                                             | 82.0        | ref 5      |
| porous carbon GF                         | 100                                            | 68.7        | ref 6      |
| Water activated GF                       | 50                                             | 83.1        | ref 7      |



## 59 Reference

- 60 1. A. J. Bard, L. R. Faulkner, J. Leddy and C. G. Zoski, *Electrochemical methods: fundamentals and*  
61 *applications*, Wiley New York, 1980.
- 62 2. A. Ejigu, M. Edwards and D. A. Walsh, *ACS Catalysis*, 2015, **5**, 7122-7130.
- 63 3. M. Park, Y.-j. Jung, J. Kim, H. I. Lee and J. Cho, *Nano letters*, 2013, **13**, 4833-4839.
- 64 4. Z. He, L. Dai, S. Liu, L. Wang and C. Li, *Electrochimica Acta*, 2015, **176**, 1434-1440.
- 65 5. G. Wei, C. Jia, J. Liu and C. Yan, *Journal of Power Sources*, 2012, **220**, 185-192.
- 66 6. J. Liu, Z. Wang, X. Wu, X. Yuan, J. Hu, Q. Zhou, Z. Liu and Y. Wu, *Journal of Power Sources*, 2015,  
67 **299**, 301-308.
- 68 7. D. M. Kabtamu, J.-Y. Chen, Y.-C. Chang and C.-H. Wang, *Journal of Power Sources*, 2017, **341**,  
69 270-279.

70
